# Supplementary material
Source: PubMed Central journal article supplement (PMC5334202)
Supplement: 11302_2016_9542_MOESM1_ESM.pdf [file 11302_2016_9542_MOESM1_ESM.pdf]

**Supporting Information**

**Synthesis, characterization, and in vitro evaluation of the selective  
P2Y<sub>2</sub> receptor antagonist AR-C118925**

Muhammad Rafehi, Joachim C. Burbiel, Isaac Y. Attah, Aliaa Abdelrahman, and

Christa E. Müller<sup>§</sup>

*PharmaCenter Bonn, Pharmaceutical Institute, Pharmaceutical Sciences Bonn  
(PSB), Pharmaceutical Chemistry I, University of Bonn, Germany*

<sup>§</sup>Address correspondence to:

Dr. Christa E. Müller, Pharmazeutisches Institut, Pharmazeutische Chemie I, An der  
Immenburg 4, D-53121 Bonn, Germany. Phone: +49-228-73-2301. Fax: +49-228-73-  
2567. E-mail address: [christa.mueller@uni-bonn.de](mailto:christa.mueller@uni-bonn.de)

## Materials and methods

### *Radioligand receptor binding assays: CB<sub>1</sub> and CB<sub>2</sub>*

For the cannabinoid receptors CB<sub>1</sub> and CB<sub>2</sub>, competition binding assays were performed as described before [1] using the CB agonist radioligand [<sup>3</sup>H](–)-cis-3-[2-hydroxy-4-(1,1-dimethylheptyl)phenyl]-trans-4-(3-hydroxypropyl)cyclohexanol (CP55,940, final concentration = 0.1 nM). As a source for human CB<sub>1</sub> and CB<sub>2</sub> receptors, membrane preparations of Chinese hamster ovary cells stably expressing the respective receptor subtype were used (CB<sub>1</sub>: 20 µg of protein/vial; CB<sub>2</sub>: 2 µg of protein/vial). After addition of 15 µl of test compound in DMSO, 60 µl of [<sup>3</sup>H]CP55,940 solution in assay buffer (50 mM TRIS, 3 mM MgCl<sub>2</sub>, pH 7.4), and 60 µl of membrane preparation to 465 µl of assay buffer (50 mM TRIS, 3 mM MgCl<sub>2</sub>, pH 7.4), the suspension was incubated for 2 h at room temperature. Total binding was determined by adding DMSO without test compound. Non-specific binding was determined in the presence of 10 µM of unlabeled CP55,940. Incubation was terminated by rapid filtration through GF/C glass fiber filters pre-soaked for 0.5 h with 0.3% aqueous polyethyleneimine solution. Filters were washed three times with ice-cold washing buffer (50 mM TRIS, 0.1% bovine serum albumin, pH 7.4) and then dried for 1.5 h at 50 °C. Radioactivity on the filters was determined in a Tri-Carb<sup>®</sup> 2810TR (PerkinElmer) liquid scintillation counter after 6 h of incubation with 3 ml of Lumasafe<sup>™</sup> scintillation cocktail.

### *Radioligand receptor binding assays: adenosine receptors*

For adenosine receptors, the procedure has been previously described in detail [2, 3]. Briefly, radioligand/Tris-buffer solution (100 µl) was given to 10 µl of compound diluted in DMSO and 790 µl of Tris-buffer (50 mM, pH 7.4), following which 100 µl of

membrane suspension containing the respective receptor was added and incubated for 1.25 h at room temperature. Following incubation, the radioligand bound to the receptor was separated from unbound radioligand by harvesting using a Brandel® MP48 harvester and GF/B glass fiber filters. Lumasafe™ scintillation cocktail (3 ml) was given to the filter and, after 9 h of incubation, radioactive counts were measured using a Tri-Carb® 2810TR (PerkinElmer) liquid scintillation counter. The radioligands used were [<sup>3</sup>H]CCPA for the A<sub>1</sub> adenosine receptor, [<sup>3</sup>H]MSX-2 for the A<sub>2A</sub> adenosine receptor, [<sup>3</sup>H]PSB-603 for the A<sub>2B</sub> adenosine receptor, and [<sup>3</sup>H]PSB-11 for the A<sub>3</sub> adenosine receptor.

### *β-Arrestin assays: GPR18, GPR55*

The Chinese hamster ovary (CHO) cell lines expressing the human GPR18 and GPR55 receptors were purchased from DiscoverX (Fremont, CA, USA). The β-arrestin assays for GPR18 and GPR55 were done as described for the P2Y<sub>2</sub> receptor in the main text, with the exception that test compound dilutions were done in phosphate-buffered saline (PBS) containing 10% DMSO and 0.1 % bovine serum albumin. For GPR18, tetrahydrocannabinol (10 μM), and for GPR55 lysophosphatidylinositol (1 μM) was used as agonist.

### *NPP1-3 assays*

Materials: 4-Aminoantipyrine, adenosine 5'-monophosphate (AMP), adenosine 5'-triphosphate (ATP), calcium chloride, choline oxidase, dimethyl sulfoxide (DMSO), magnesium chloride, 1-oleoyl-*sn*-glycero-3-phosphocholine (LPC (18:1)), peroxidase from horseradish, sodium hydroxide, and 3-(*N*-ethyl-3-methylanilino)-2-hydroxypropanesulfonic acid (TOOS) were supplied by Sigma (Steinheim, Germany).

2-(*N*-Cyclohexylamino)ethanesulfonic acid (CHES) and Tris(hydroxymethyl)aminomethane (Tris) were purchased from Applichem (Darmstadt, Germany). Disodium hydrogen phosphate was obtained from Carl Roth (Karlsruhe, Germany). Human recombinant soluble NPP1-3 stably expressed in Sf9 insect cells, were prepared in our laboratory [4].

NPP1 and NPP3 assays: For the assessments at human NPP1 and -3, we utilized a capillary electrophoresis (CE) assay based on the method described by Chang *et al.* [5] using adenosine 5'-triphosphate (ATP) as substrate. The test compounds were initially screened in a concentration of 100  $\mu$ M. They were dissolved in reaction buffer (1 mM MgCl<sub>2</sub>, 2 mM CaCl<sub>2</sub>, 10 mM CHES (2-(*N*-cyclohexylamino)ethanesulfonic acid), pH 9.0) together with ATP as a substrate (400  $\mu$ M). The reaction was initiated by adding 20  $\mu$ l of human NPP1 (1.7  $\mu$ g) or human NPP3 (43  $\mu$ g), respectively. The mixture was then incubated for 30 min (NPP1) or 60 min (NPP3) and stopped by heating at 90 °C for 3 min. After cooling the reaction samples on ice, they were transferred into CE vials and injected into the CE instrument. The operation conditions in CE analyses were as follows: P/ACE MDQ capillary electrophoresis system (Beckman Instruments, Fullerton, CA, USA) equipped with a DAD detection system. Data collection and peak area analysis were performed by the P/ACE MDQ software 32 KARAT obtained also from Beckman Coulter (Fullerton, CA, USA). The electrophoretic separations were performed using a polyacrylamide-coated capillary (50 cm (eff.), x 50  $\mu$ m (id) supplied by CS-Chromatography (Langerwehe, Germany)). Electrokinetic injections were performed using a voltage of -9 kV for 90 s and separations were carried out by a voltage of -20 kV. The amount of adenosine 5'-monophosphate (AMP) produced were detected at 260 nm. The running buffer

consisted of 50 mM phosphate buffer (pH 6.5). Between separations, the capillary was washed with water for 2 min (20 psi) and subsequently with running buffer for 2 min (20 psi) before each injection. For human NPP1, a concentration-inhibition curve was determined with different concentrations of AR-C118925 (**3**) and derivative **5** in a range of 0.02-200  $\mu$ M. The IC<sub>50</sub> value was then determined from three independent experiments using Prism 5.0 (Graphpad Software, San Diego, CA, USA).

NPP2 assay: Inhibitory activity at human NPP2 was determined using spectrophotometric assays with 1-oleoyl-*sn*-glycero-3-phosphocholine (LPC (18:1)) as a substrate [4, 5]. Lysophospholipase-D activities were measured at 37 °C in a final volume of 50  $\mu$ l. The reaction mixture included 5 mM MgCl<sub>2</sub>, 5 mM CaCl<sub>2</sub>, 100 mM Tris, pH 9.0, together with 400  $\mu$ M LPC (18:1). The reaction was started by the addition of 10  $\mu$ l of human NPP2 (44  $\mu$ g), and then incubated at 37 °C for 60 min. Subsequently, the released choline was quantified colorimetrically at 555 nm after incubation at 37 °C for 10 min with 50  $\mu$ l of each, the peroxidase reagent (50 mM Tris at pH 9.0, 2 mM 3-(*N*-ethyl-3-methylanilino)-2-hydroxypropanesulfonic acid (TOOS), 5 U/ml peroxidase), and the choline oxidase reagent (50 mM Tris at pH 9.0, 2 mM 4-aminoantipyrine, 5 U/ml choline oxidase). All experiments were carried out twice in triplicates.

### *Human NTPDases 1-3, 8: malachite green assay*

Substrate ATP (20  $\mu$ l) in assay buffer (5 mM CaCl<sub>2</sub> and 80 mM Tris with the pH value adjusted to 7.4) was added to a well of a 96-well plate containing 10  $\mu$ l 10% aq. DMSO or test compound in 10% aq. DMSO. The reaction was initiated by addition of 20  $\mu$ l NTPDase protein extract in assay buffer to give a final concentration of 50  $\mu$ M

(NTPDase1) or 100  $\mu$ M (NTPDase2, 3, and 8) nucleotide and 4.0 ng/ $\mu$ l NTPDase1, 1.2 ng/ $\mu$ l ng/ $\mu$ l NTPDase2, 3.0 ng/ $\mu$ l NTPDase3, or 7.0 ng/ $\mu$ l NTPDase8 enzyme, respectively [4, 6, 7]. The mixture was incubated for 10 min at 37°C and terminated by the addition of 17.2  $\mu$ l ammonium molybdate solution and 12.8  $\mu$ l malachite green reagent [8]. After 20 min of incubation at room temperature, absorbance measurements were made at 623 nm on a BMG PheraStar FS plate reader (BMG Labtech GmbH, Ortenberg, Germany) and the percentage inhibition was calculated.

### *Ecto-5'-nucleotidase radiometric assay*

The procedure for experiments on the ecto-5'-nucleotidase has been described in great detail before [9]. The substrate [ $^3$ H]AMP was separated from the product [ $^3$ H]adenosine by precipitation with lanthanum chloride and further filtration through glass fiber filters. The product was quantified using a Tri-Carb<sup>®</sup> 2810TR (PerkinElmer) liquid scintillation counter. The enzyme used was recombinant rat ecto-5'-nucleotidase expressed in Sf9 insect cells [10]. Three separate experiments were performed for determination of IC<sub>50</sub> values from dose-response curves using 10 different concentrations of inhibitor.

**Results and discussion***Pharmacological evaluation of AR-C118925 (3) and its derivative 5 on targets not directly linked to purinergetic signaling*

Complementing the testings on the P2Y, P2X and adenosine receptors, and on the ectonucleotidases presented in the main text, we also assessed AR-C118925 (**3**) and its derivative **5** for antagonism on a few targets that are not directly involved in purinergetic signaling: the orphan receptors GRP18, and GPR55, as well as the cannabinoid receptors CB<sub>1</sub> and CB<sub>2</sub>. For AR-C118925, moderate to weak antagonism was observed for both of the orphan receptors (Table 1). AR-C118925 is at least a hundred-fold selective for the P2Y<sub>2</sub> receptor over these other G protein-coupled receptors. The de-methylated oxo-analog **5** was less potent on GPR18, GPR55, and the CB<sub>2</sub> receptor but slightly more potent on the CB<sub>1</sub> receptor.

**Table 1** Evaluation of AR-C118925 and its derivative **5** on other targets not directly related to purinergic signaling.

| Receptor                                                                 | IC <sub>50</sub> or K <sub>i</sub> value (μM) <sup>a</sup><br>(or % inhibition at indicated concentration) |                                      |
|--------------------------------------------------------------------------|------------------------------------------------------------------------------------------------------------|--------------------------------------|
|                                                                          | AR-C118925 ( <b>3</b> )                                                                                    | Derivative <b>5</b>                  |
| <b>Human GPR18</b><br><i>β-arrestin assay</i>                            | > 10 <sup>b</sup>                                                                                          | > 10 <sup>b</sup><br>(36 % at 10 μM) |
| <b>Human GPR55</b><br><i>β-arrestin assay</i>                            | > 10 <sup>b</sup>                                                                                          | >> 10 <sup>b</sup><br>(6 % at 10 μM) |
| <b>Human CB<sub>1</sub></b><br><i>radioligand receptor binding assay</i> | > 10<br>(34 % at 10 μM)                                                                                    | 3.59 ± 1.58                          |
| <b>Human CB<sub>2</sub></b><br><i>radioligand receptor binding assay</i> | > 10<br>(30 % at 10 μM)                                                                                    | > 10<br>(35 % at 10 μM)              |

<sup>a</sup> n = 3-4

<sup>b</sup> receptor was activated with an agonist concentration that induced 80 % of maximal stimulation (EC<sub>80</sub>)

#### *Mode of antagonism of AR-C118925 (**3**) on the P2Y<sub>2</sub> receptor*

In order to determine whether AR-C118925 (**3**) acts as a competitive or an allosteric antagonist on the P2Y<sub>2</sub> receptor, we determined concentration-effect curves for the agonist UTP following pre-incubation with different, fixed concentrations of AR-C118925. Listed here are the EC<sub>50</sub> values for UTP determined using the calcium mobilization assay (Table 2) and the β-arrestin assay (Table 3) – compare Fig. 5 in the main text.



**Table 2** EC<sub>50</sub> values and maximal receptor activation for the different dose-response curves of UTP following pre-incubation with different, fixed concentrations of AR-C118925, determined using the calcium mobilization assay

| [AR-C118925 (3)] (μM) | EC <sub>50</sub> of UTP (μM) <sup>a</sup> | Maximal receptor activation with 75 μM UTP (%) |
|-----------------------|-------------------------------------------|------------------------------------------------|
| 0                     | 0.0838 ± 0.0223                           | 103                                            |
| 0.15                  | 0.255 ± 0.019                             | 114                                            |
| 0.3                   | 0.832 ± 0.246                             | 114                                            |
| 1                     | 1.38 ± 0.14                               | 98                                             |
| 3                     | 2.63 ± 0.14                               | 102                                            |
| 30                    | n. d. <sup>b</sup>                        | 5                                              |

<sup>a</sup> n = 3-6

<sup>b</sup> a full agonist curve could not be obtained at this concentration of antagonist

**Table 3** EC<sub>50</sub> values and maximal receptor activation for the different dose-response curves of UTP following pre-incubation with different, fixed concentrations of AR-C118925, determined using the β-arrestin assay

| [AR-C118925 (3)] (μM) | EC <sub>50</sub> of UTP (μM) <sup>a</sup> | Maximal receptor activation (%) |
|-----------------------|-------------------------------------------|---------------------------------|
| 0                     | 0.858 ± 0.067                             | 100 with 100 μM UTP             |
| 0.3                   | 4.48 ± 0.47                               | 103 with 100 μM UTP             |
| 1                     | 10.6 ± 0.4                                | 93 with 100 μM UTP              |
| 3                     | 22.9 ± 4.2                                | 91 with 1000 μM UTP             |
| 5                     | 38.6 ± 1.1                                | 97 with 300 μM UTP              |

<sup>a</sup> n = 3

*Physicochemical and pharmacokinetic properties of AR-C118925*

The susceptibility to metabolism in the liver was tested by incubation of 1  $\mu\text{M}$  of AR-C118925 (**3**) with human and mouse liver microsomes and measuring the concentration of the remaining compound at different time points. Over the entire course of 1 h, the concentration of AR-C118925 (**3**) remained at approx. 1  $\mu\text{M}$  and the compound was, thus, not metabolized significantly (Fig. 1). These results show that AR-C118925 appears to have a very high metabolic stability, which is an important prerequisite for *in vivo* studies.

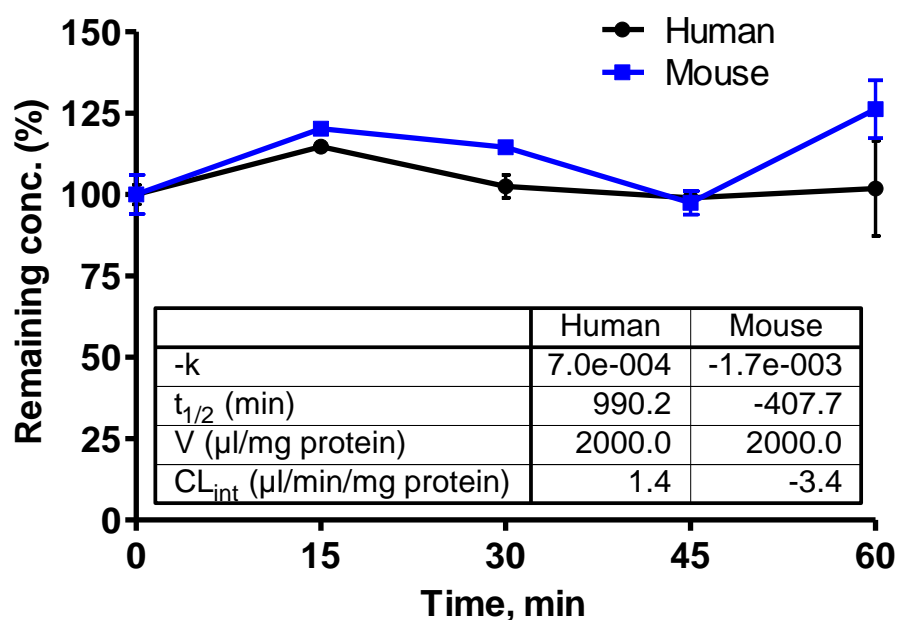

**Fig. 1** Metabolic Stability of AR-C118925 (**3**) in human (black dots) and mouse (blue squares) liver microsomes. Data points represent mean values  $\pm$  SEM of two separate experiments. Where no error bar is apparent, the SEM is too low to be seen.

The ability of AR-C118925 to permeate a monolayer of Caco2 cells was also determined to model the absorption properties of the human small intestine mucosa

following oral administration. We found that the permeability of AR-C118925 was moderate, similar to that of the hydrophilic reference compound atenolol (Table 4)

**Table 4** Caco2 cell monolayer permeation of AR-C118925 in comparison to two reference compounds

| Compound       | $P_{app} \times 10^{-6}$ (cm/sec) <sup>a</sup> | SD $\times 10^{-6}$ |
|----------------|------------------------------------------------|---------------------|
| AR-C118925 (3) | 1.1                                            | 0.2                 |
| Atenolol       | 0.7                                            | 0.6                 |
| Testosterone   | 8.5 <sup>b</sup>                               | n.a.                |

<sup>a</sup> n = 2, unless stated otherwise

<sup>b</sup> n = 1

**References**

1. Rempel V, Volz N, Hinz S, Karcz T, Meliciani I, Nieger M, Wenzel W, Bräse S, Müller CE (2012) 7-Alkyl-3-benzylcoumarins: a versatile scaffold for the development of potent and selective cannabinoid receptor agonists and antagonists. *J Med Chem* 55:7969–7977
2. Borrmann T, Hinz S, Bertarelli DCG, Li W, Florin NC, Scheiff AB, Müller CE (2009) 1-Alkyl-8-(piperazine-1-sulfonyl)phenylxanthines: development and characterization of adenosine A<sub>2B</sub> receptor antagonists and a new radioligand with subnanomolar affinity and subtype specificity. *J Med Chem* 52:3994–4006
3. Stößel A, Schlenk M, Hinz S, Küppers P, Heer J, Gütschow M, Müller CE (2013) Dual targeting of adenosine A<sub>2A</sub> receptors and monoamine oxidase B by 4H-3,1-Benzothiazin-4-ones. *J Med Chem* 56:4580–4596
4. Lee S-Y, Fiene A, Li W, Hanck T, Brylev KA, Fedorov VE, Lecka J, Haider A, Pietzsch H-J, Zimmermann H, Sévigny J, Kortz U, Stephan H, Müller CE (2015) Polyoxometalates-potent and selective ecto-nucleotidase inhibitors. *Biochem Pharmacol* 93: 171–181
5. Chang L, Lee S-Y, Leonczak P, Rozenski J, De Jonghe S, Hanck T, Müller CE, Herdewijn P (2015) Imidazopyridine- and purine-thioacetamide derivatives: potent inhibitors of nucleotide pyrophosphatase/phosphodiesterase 1 (NPP1). *J Med Chem* 57:10080-10100
6. Fiene A, Baqi Y, Lecka J, Sévigny J, Müller CE (2015) Fluorescence polarization immunoassays for monitoring nucleoside triphosphate diphosphohydrolase (NTPDase) activity. *Analyst* 140:140–148
7. Lecka J, Gillerman I, Fausther M, Salem M, Munkonda MN, Brosseau J-P, Cadot C, Martín-Satué M, D'Orléans-Juste P, Rousseau E, Poirier D, Künzli B,

- Fischer B, Sévigny J (2013) 8-BuS-ATP derivatives as specific NTPDase1 inhibitors. *Br J Pharmacol* 169:179-196
8. Cogan EB, Birrell GB, Griffith OH (1999) A robotics-based automated assay for inorganic and organic phosphates. *Anal Biochem* 271: 29-35
  9. Freundlieb M, Zimmermann H, Müller CE (2014) A new, sensitive ecto-5'-nucleotidase assay for compound screening. *Anal Biochem* 446:53-58
  10. Servos J, Reiländer H, Zimmermann H (1998) Catalytically active soluble ecto-5'-nucleotidase purified after heterologous expression as a tool for drug screening. *Drug Dev Res* 45:269-276
